# Supplementary material for: Targeting Pro-Survival Autophagy Enhanced GSK-3β Inhibition-Induced Apoptosis and Retarded Proliferation in Bladder Cancer Cells
Source: MDPI journal article supplement (doi:10.3390/curroncol30060406), 2023-05-28
Supplement: s1 [file s1]

# Targeting Pro-Survival Autophagy Enhanced GSK-3 $\beta$ Inhibition-Induced Apoptosis and Retarded Proliferation in Bladder Cancer Cells

## Supplementary Materials

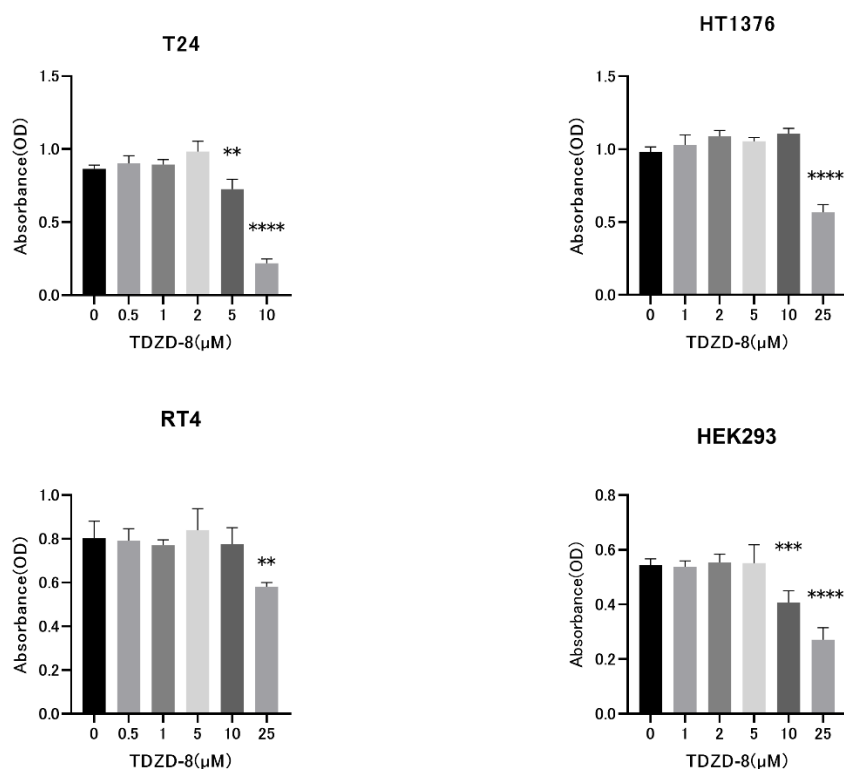

Supplementary Figure S1. Bladder cancer cells and human embryonic kidney 293(HEK293) cells were treated with the indicated concentration of TDZD-8 for 72 hours. Relative cell viability was measured by MTS assay. OD: optical density. \*\* $p < 0.01$ , \*\*\* $p < 0.001$ , \*\*\*\* $p < 0.0001$ ; compared to control cells.

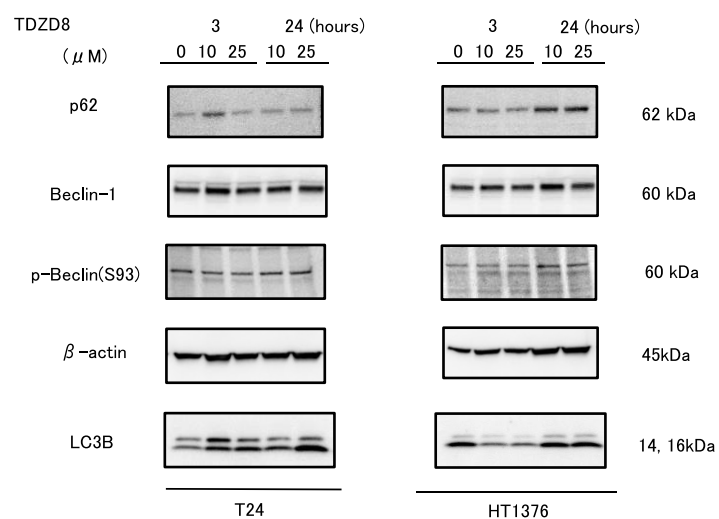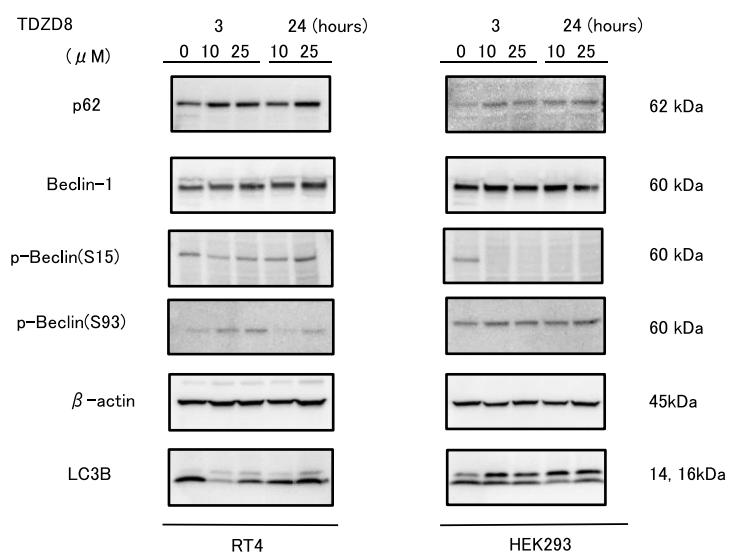

Supplementary Figure S2. Effect of TDZD-8 on the expression of autophagy-related proteins in bladder cancer cells. Western blot analysis of p62, Beclin-1, p-Beclin(s15, s93) and LC3B.  $\beta$ -actin was used as a loading control.

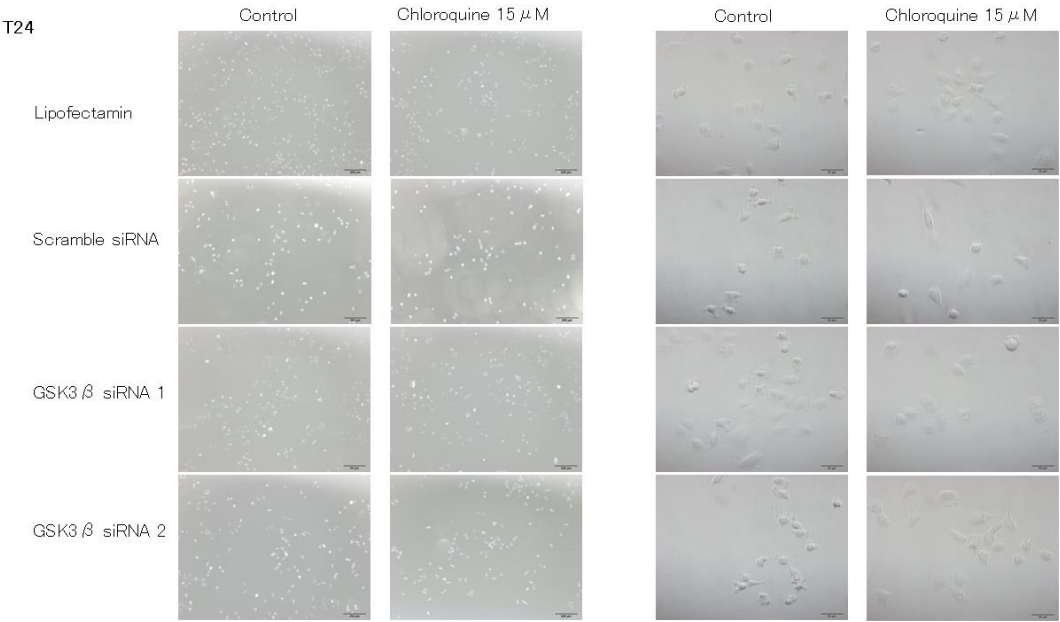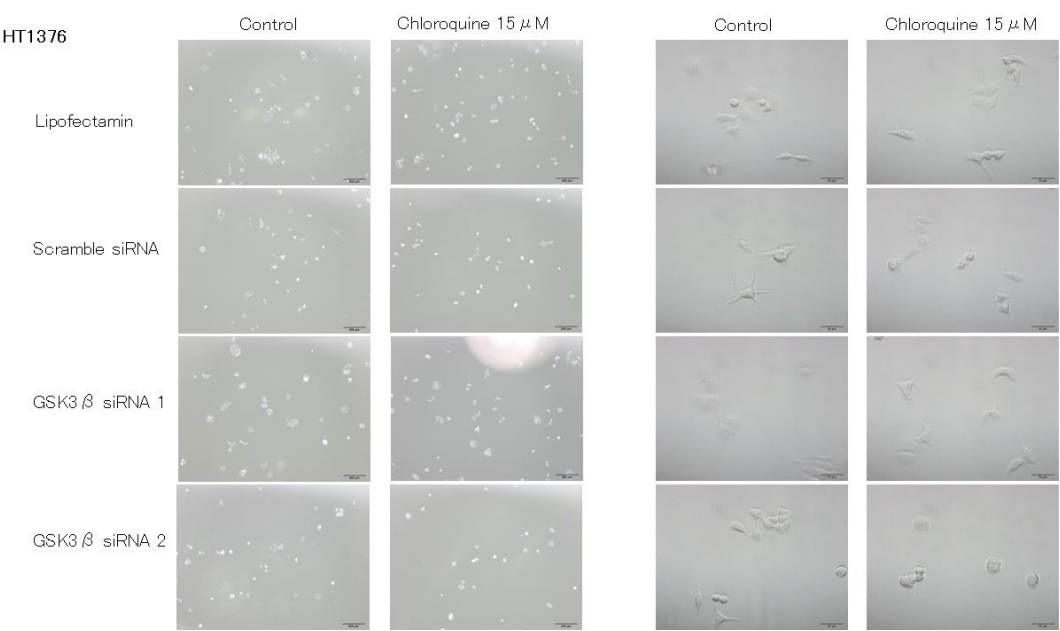

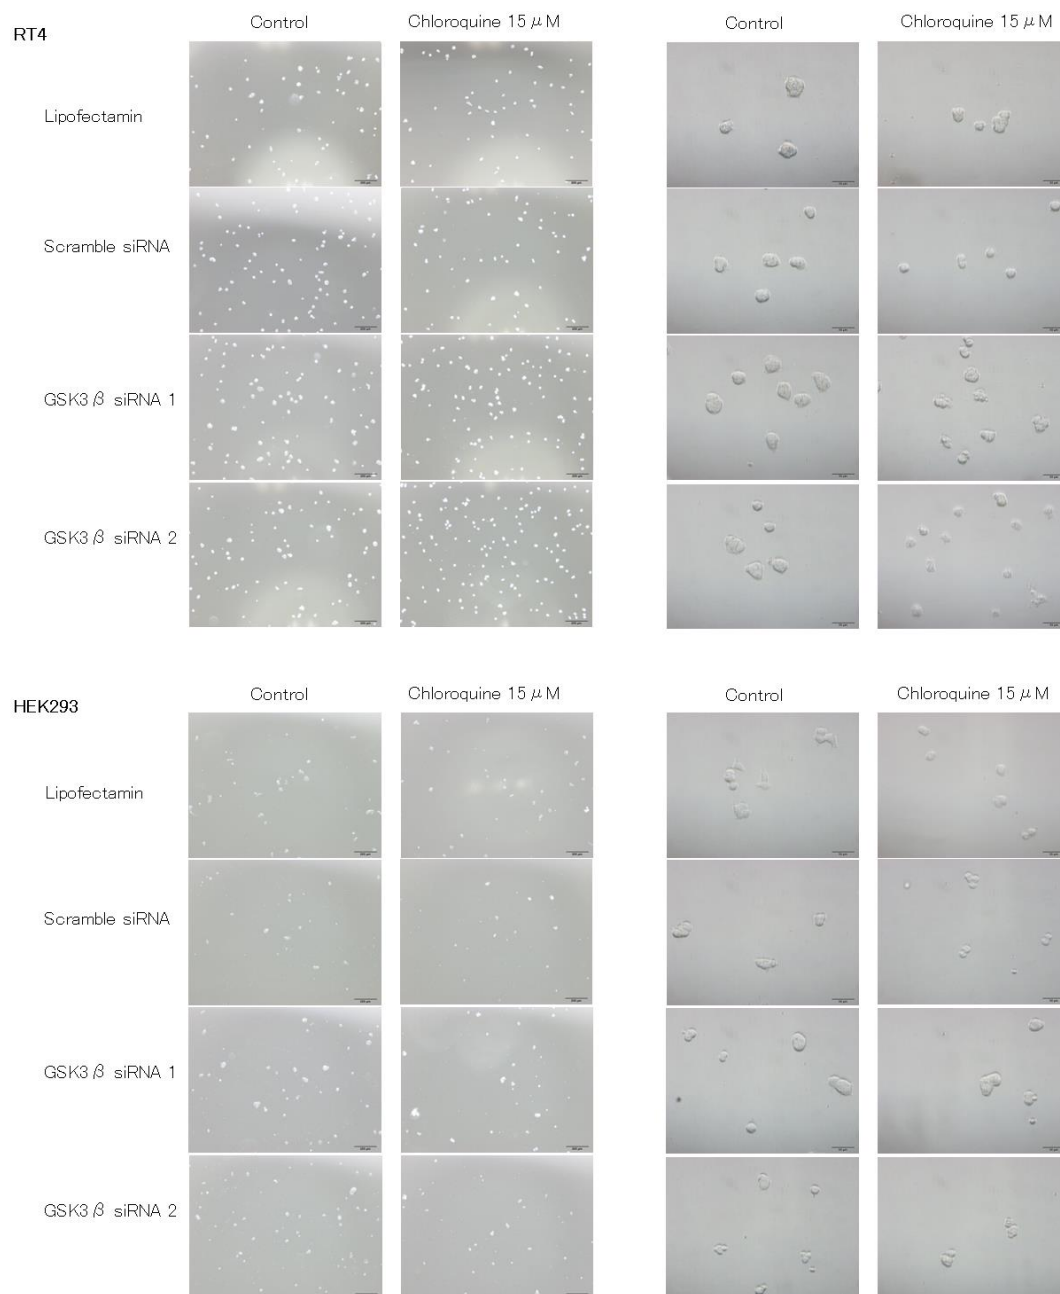

**Supplementary Figure S3.** Morphological changes in the cells after GSK-3 $\beta$  knockdown using siRNA. siGSK-3 $\beta$ -transfected bladder cancer cells treated with chloroquine for 24 hours showed extensive vacuolation. Scale bar=200  $\mu$ m(left 2 columns) and 50  $\mu$ m(right 2 columns).
