# Supplementary material for: Targeting Pro-Survival Autophagy Enhanced GSK-3β Inhibition-Induced Apoptosis and Retarded Proliferation in Bladder Cancer Cells
Source: MDPI journal article supplement (doi:10.3390/curroncol30060406), 2023-05-28
Supplement: s1 [file s1]

a) T24  
AR-A014418(μ M)

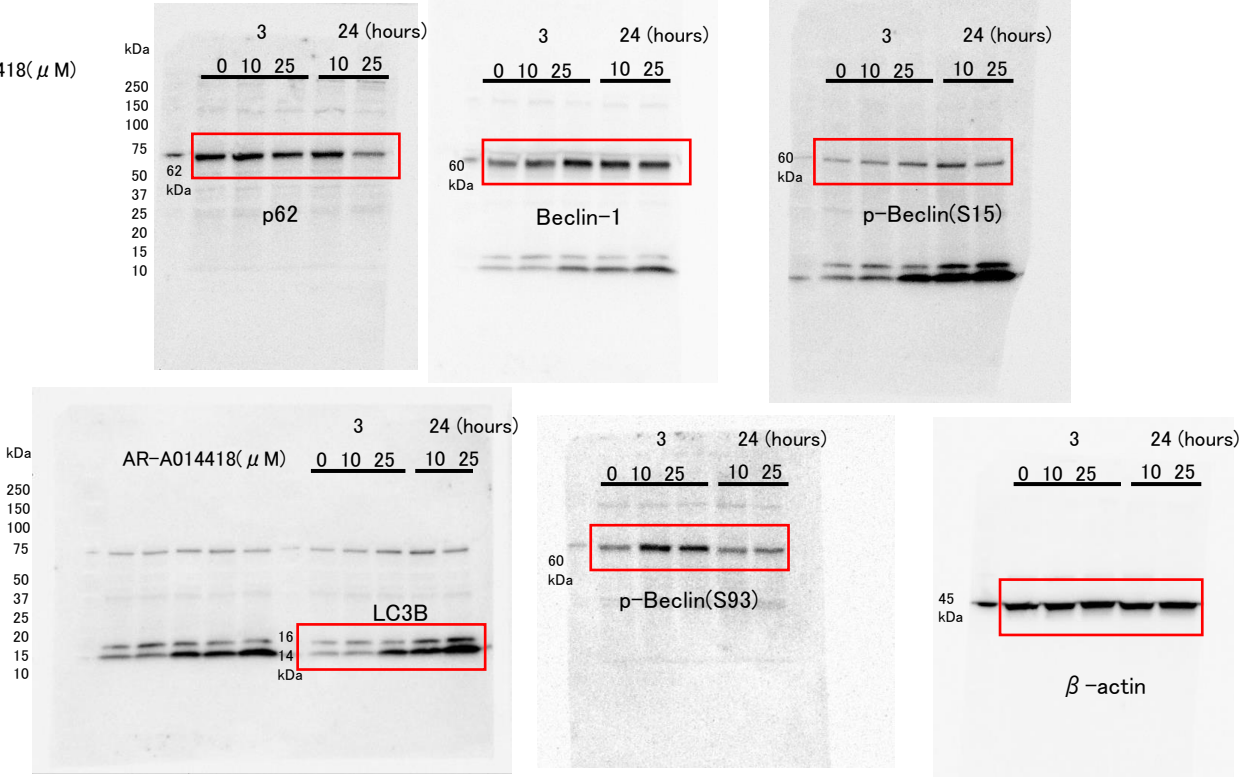

|                       | 3     |       | 24 (hours) |       |         |
|-----------------------|-------|-------|------------|-------|---------|
|                       | 0     | 10    | 25         | 10    | 25 (μM) |
| p62/β-actin           | 0.956 | 0.903 | 0.745      | 1.003 | 0.331   |
| Beclin-1/β-actin      | 0.456 | 0.575 | 0.837      | 1.03  | 0.761   |
| p-Beclin(S15)/β-actin | 0.203 | 0.309 | 0.428      | 0.655 | 0.335   |
| p-Beclin(S93)/β-actin | 0.455 | 0.933 | 0.759      | 0.389 | 0.221   |
| LC3B/β-actin          | 0.35  | 0.449 | 0.894      | 1.5   | 1.415   |

b) HT1376

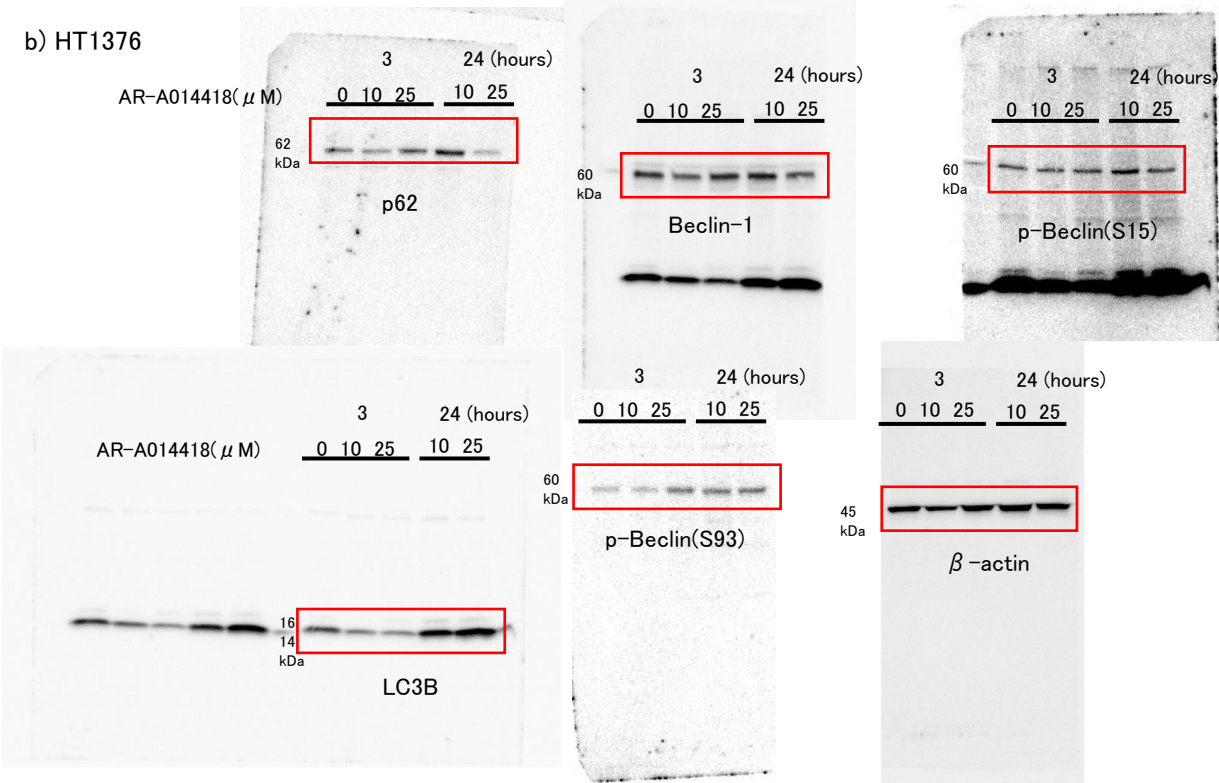

|                       | 3     |       | 24 (hours) |       |         |
|-----------------------|-------|-------|------------|-------|---------|
|                       | 0     | 10    | 25         | 10    | 25 (μM) |
| p62/β-actin           | 0.399 | 0.346 | 0.528      | 0.747 | 0.174   |
| Beclin-1/β-actin      | 0.789 | 0.881 | 0.850      | 0.856 | 0.565   |
| p-Beclin(S15)/β-actin | 0.566 | 0.600 | 0.465      | 0.530 | 0.365   |
| p-Beclin(S93)/β-actin | 0.460 | 0.500 | 0.881      | 0.930 | 0.842   |
| LC3B/β-actin          | 0.593 | 0.490 | 0.388      | 0.863 | 1.203   |

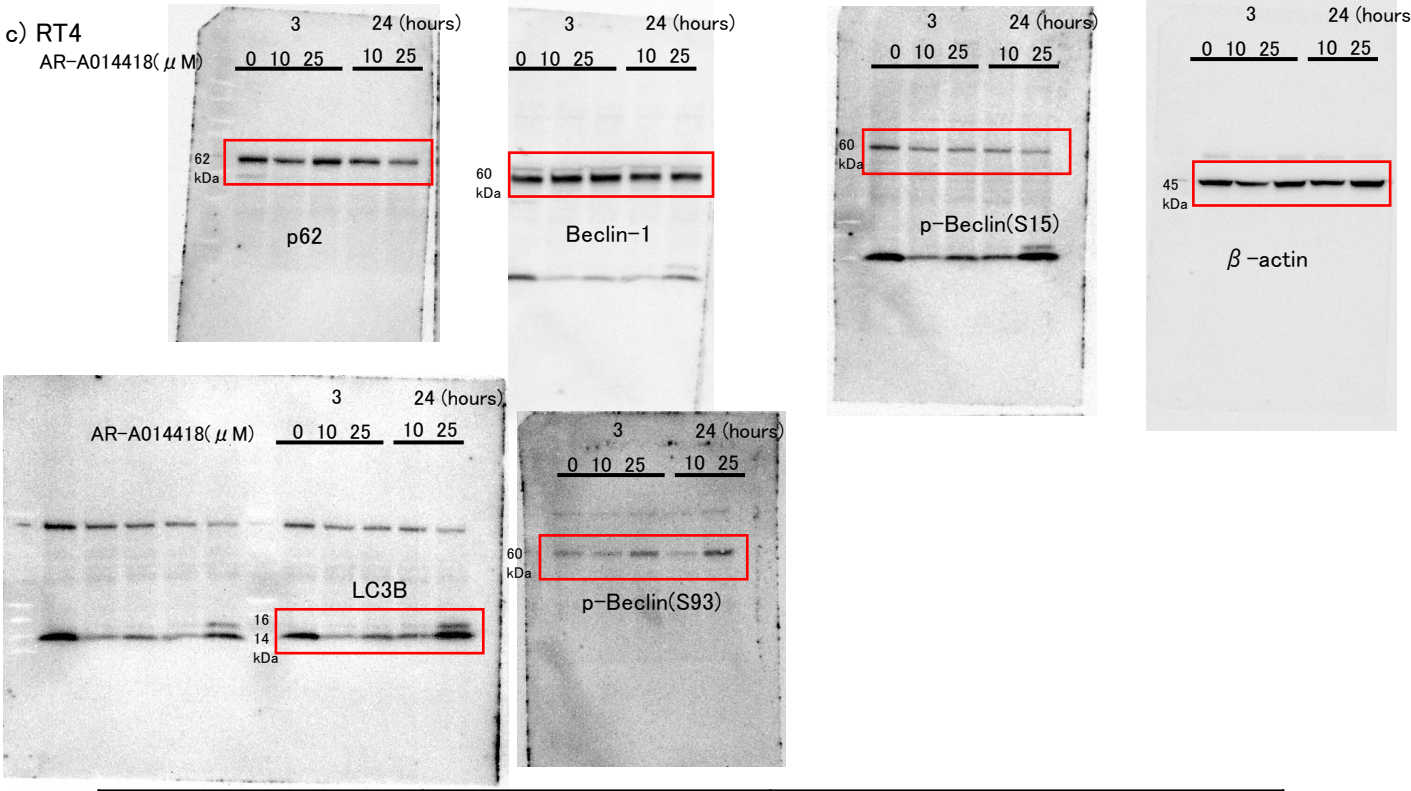

|                       | 3     |       | 24 (hours) |       |         |
|-----------------------|-------|-------|------------|-------|---------|
|                       | 0     | 10    | 25         | 10    | 25 (μM) |
| p62/β-actin           | 0.984 | 0.882 | 0.966      | 0.853 | 0.421   |
| Beclin-1/β-actin      | 0.813 | 1.516 | 1.434      | 1.320 | 0.919   |
| p-Beclin(S15)/β-actin | 0.719 | 0.551 | 0.420      | 0.446 | 0.224   |
| p-Beclin(S93)/β-actin | 0.401 | 0.401 | 0.632      | 0.311 | 0.825   |
| LC3B/β-actin          | 1.041 | 0.546 | 0.618      | 0.721 | 1.315   |

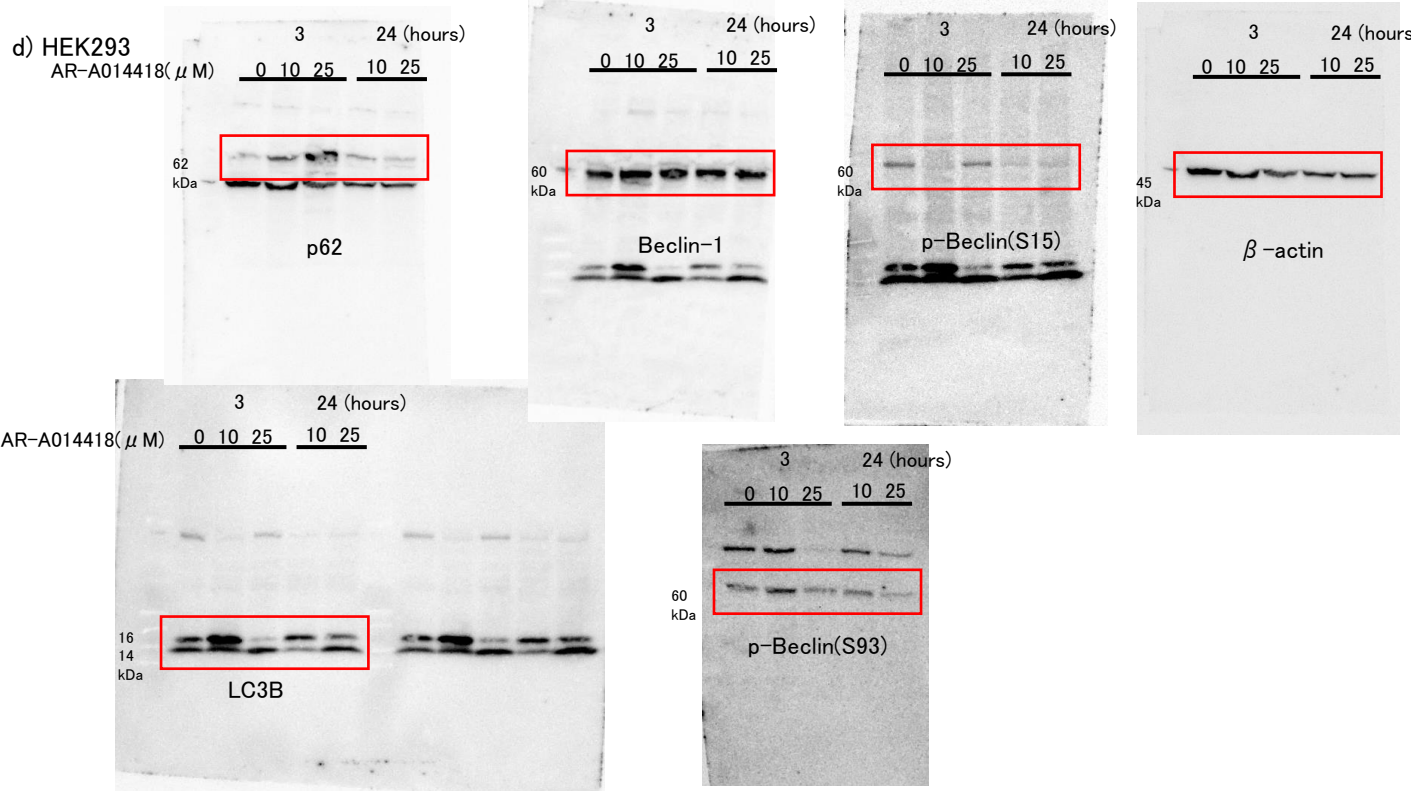

|                       | 3     |       | 24 (hours) |       |         |
|-----------------------|-------|-------|------------|-------|---------|
|                       | 0     | 10    | 25         | 10    | 25 (μM) |
| p62/β-actin           | 0.190 | 0.619 | 1.785      | 0.425 | 0.223   |
| Beclin-1/β-actin      | 0.872 | 1.352 | 1.613      | 1.632 | 1.567   |
| p-Beclin(S15)/β-actin | 0.627 | 0.135 | 0.813      | 0.130 | 0.270   |
| p-Beclin(S93)/β-actin | 0.404 | 0.837 | 0.680      | 0.828 | 0.630   |
| LC3B/β-actin          | 1.160 | 2.324 | 1.509      | 1.595 | 1.920   |

e) T24

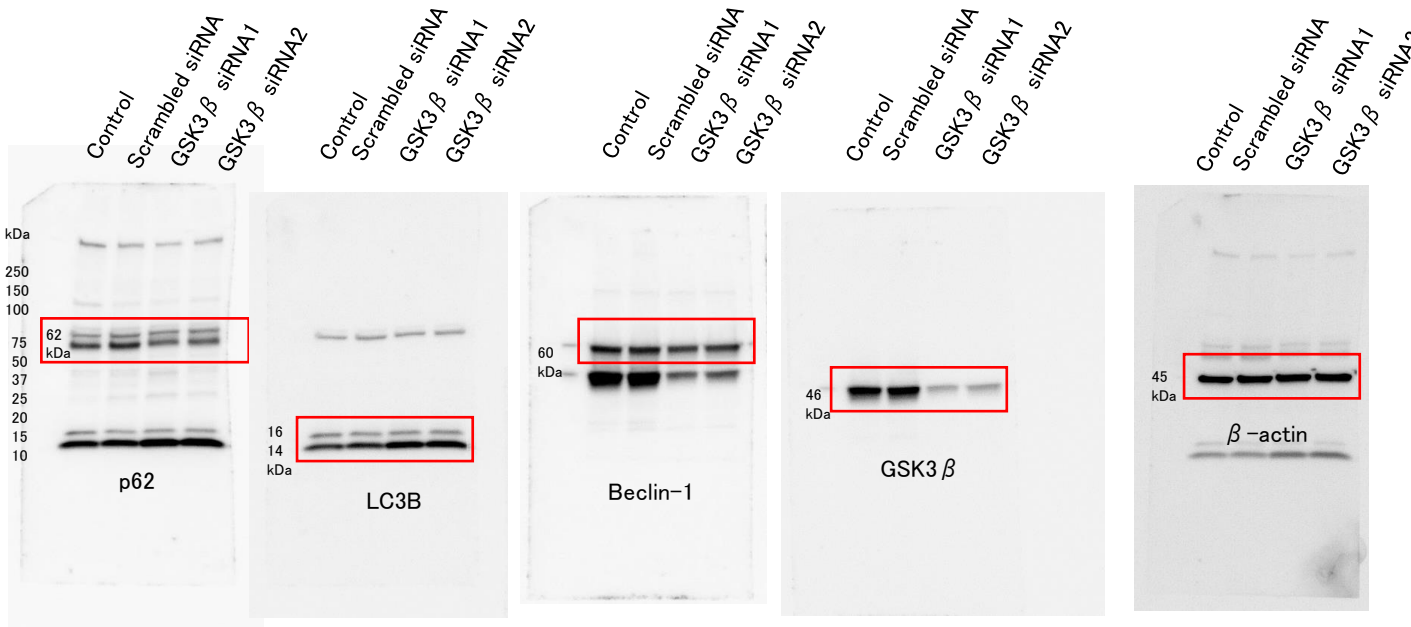

|                               | Control | Scrambled siRNA | GSK-3 $\beta$ siRNA1 | GSK-3 $\beta$ siRNA2 |
|-------------------------------|---------|-----------------|----------------------|----------------------|
| p62/ $\beta$ -actin           | 0.934   | 1.153           | 0.776                | 0.827                |
| Beclin-1/ $\beta$ -actin      | 0.806   | 0.635           | 0.540                | 0.515                |
| GSK3 $\beta$ / $\beta$ -actin | 1.270   | 1.204           | 0.273                | 0.273                |
| LC3B/ $\beta$ -actin          | 0.612   | 0.674           | 0.932                | 0.836                |

f) HT1376

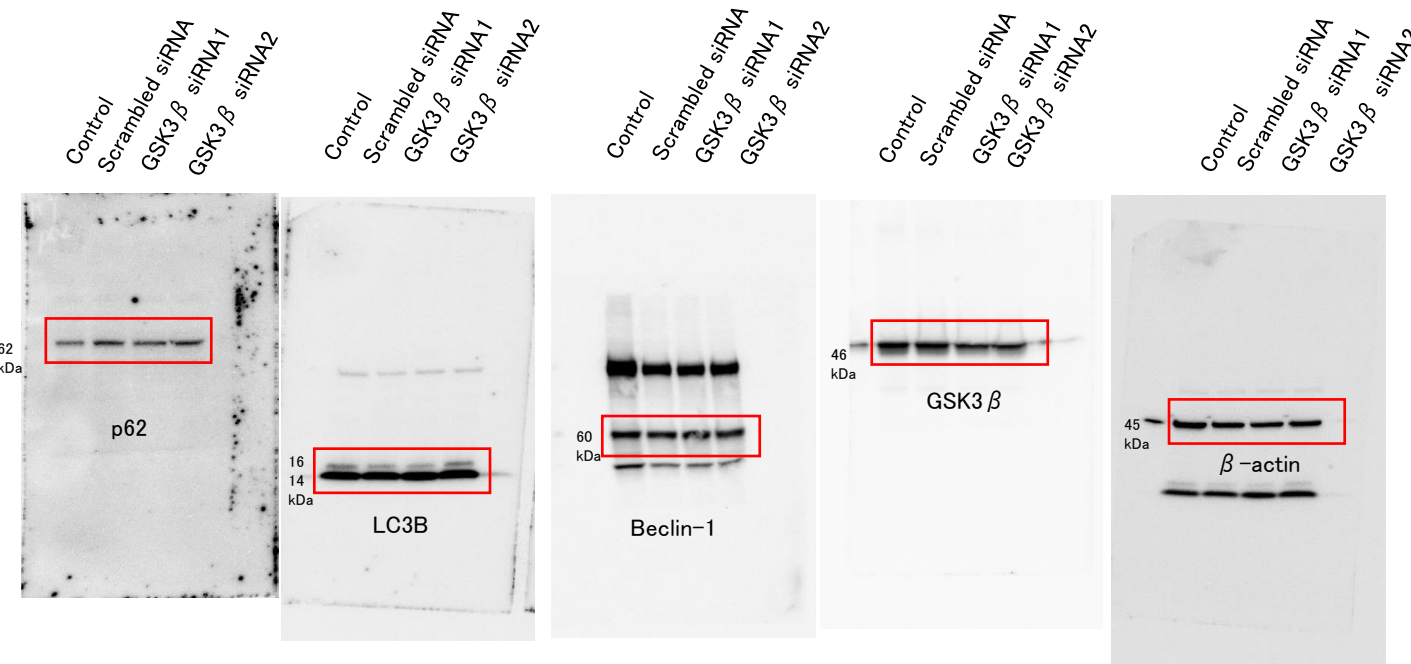

|                               | Control | Scrambled siRNA | GSK-3 $\beta$ siRNA1 | GSK-3 $\beta$ siRNA2 |
|-------------------------------|---------|-----------------|----------------------|----------------------|
| p62/ $\beta$ -actin           | 0.420   | 0.763           | 0.735                | 0.818                |
| Beclin-1/ $\beta$ -actin      | 1.060   | 1.134           | 1.098                | 1.266                |
| GSK3 $\beta$ / $\beta$ -actin | 1.156   | 1.331           | 1.330                | 1.057                |
| LC3B/ $\beta$ -actin          | 1.004   | 1.350           | 1.675                | 1.738                |



g) RT4

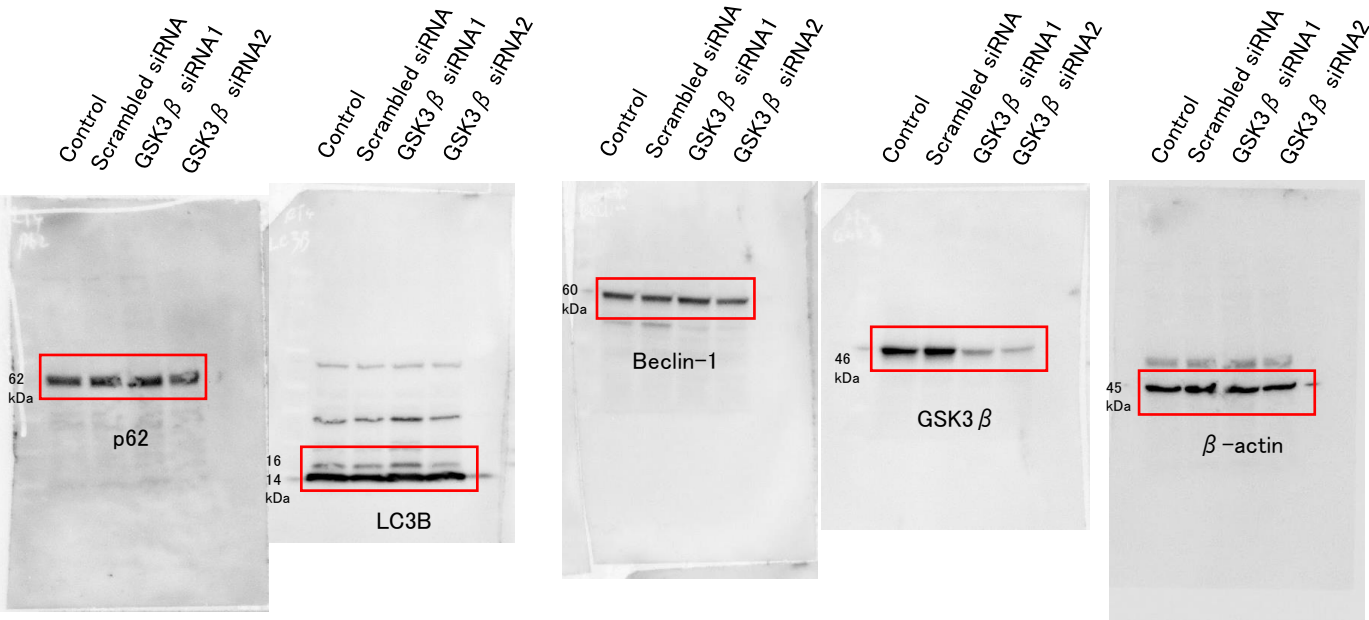

|                  | Control | Scrambled siRNA | GSK-3β siRNA1 | GSK-3β siRNA2 |
|------------------|---------|-----------------|---------------|---------------|
| p62/β-actin      | 1.254   | 1.117           | 1.368         | 1.312         |
| Beclin-1/β-actin | 1.006   | 0.920           | 1.124         | 0.909         |
| GSK3β/β-actin    | 1.122   | 0.965           | 0.345         | 0.255         |
| LC3B/β-actin     | 1.468   | 1.175           | 1.494         | 1.775         |

h) HEK293

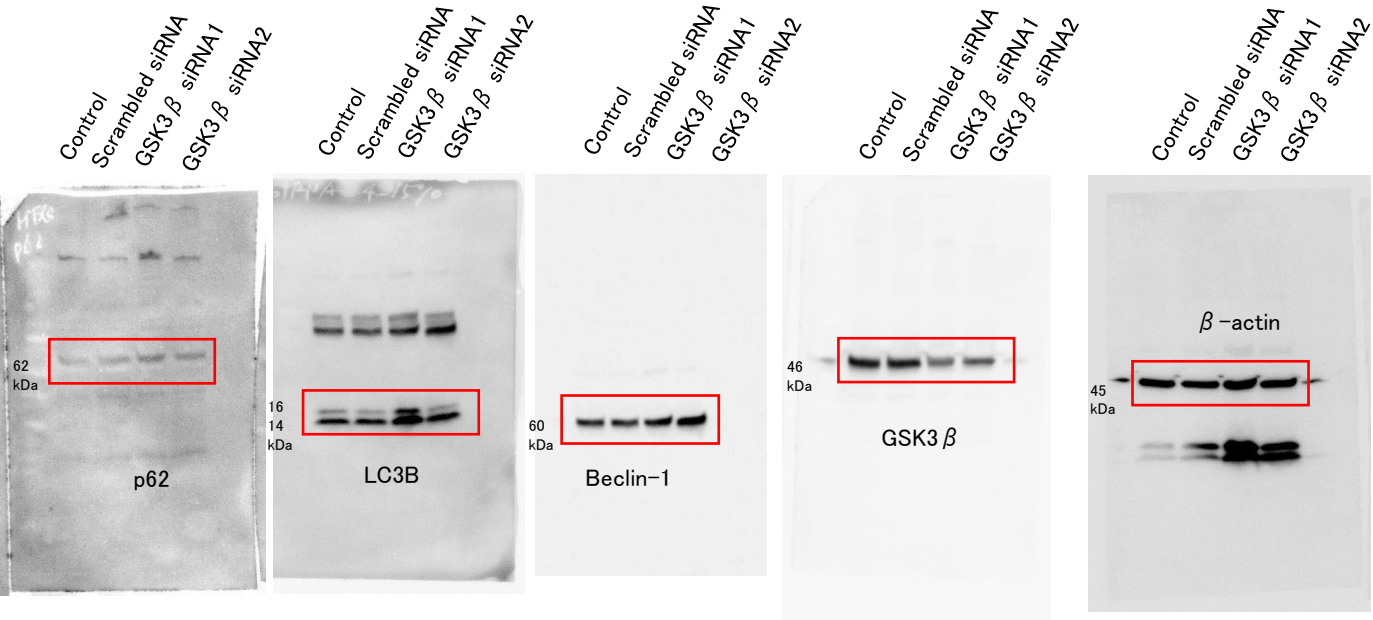

|                  | Control | Scrambled siRNA | GSK-3β siRNA1 | GSK-3β siRNA2 |
|------------------|---------|-----------------|---------------|---------------|
| p62/β-actin      | 0.245   | 0.507           | 0.542         | 0.411         |
| Beclin-1/β-actin | 0.738   | 0.755           | 0.821         | 1.246         |
| GSK3β/β-actin    | 1.058   | 1.162           | 0.574         | 0.606         |
| LC3B/β-actin     | 0.856   | 0.868           | 1.268         | 0.671         |

i) T24

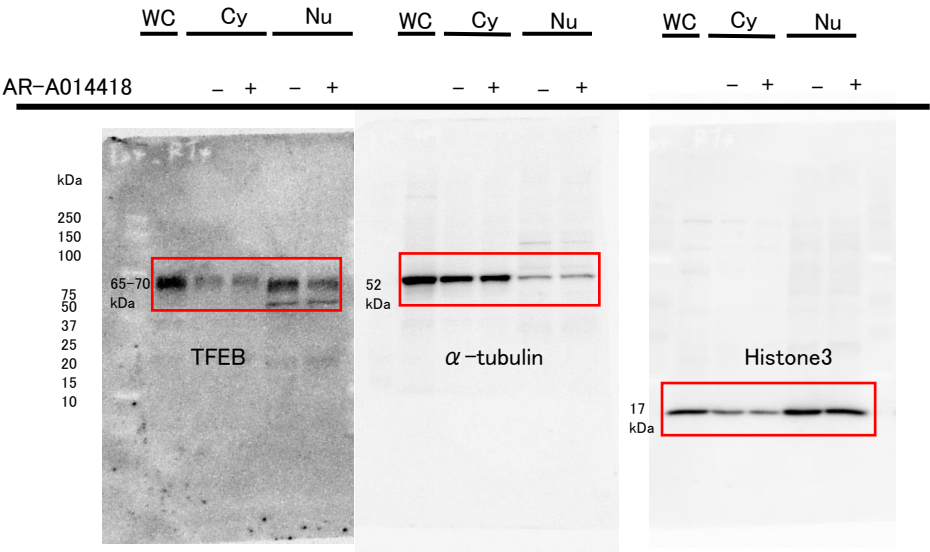

|                         | WC    | Cy    |       | Nu    |       |
|-------------------------|-------|-------|-------|-------|-------|
|                         |       | ARA-  | ARA+  | ARA-  | ARA+  |
| TFEB/ $\alpha$ -tubulin | 1.163 | 0.424 | 0.477 |       |       |
| TFEB/Histone3           |       |       |       | 0.960 | 0.513 |

j) HT1376

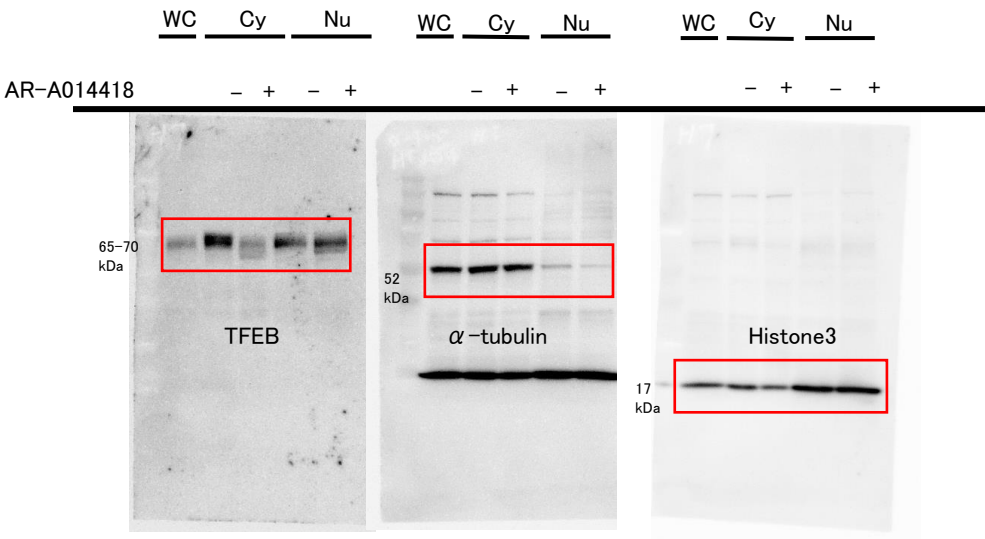

|                         | WC    | Cy    |       | Nu    |       |
|-------------------------|-------|-------|-------|-------|-------|
|                         |       | ARA-  | ARA+  | ARA-  | ARA+  |
| TFEB/ $\alpha$ -tubulin | 0.818 | 2.092 | 1.030 |       |       |
| TFEB/Histone3           |       |       |       | 1.445 | 1.628 |

k) RT4

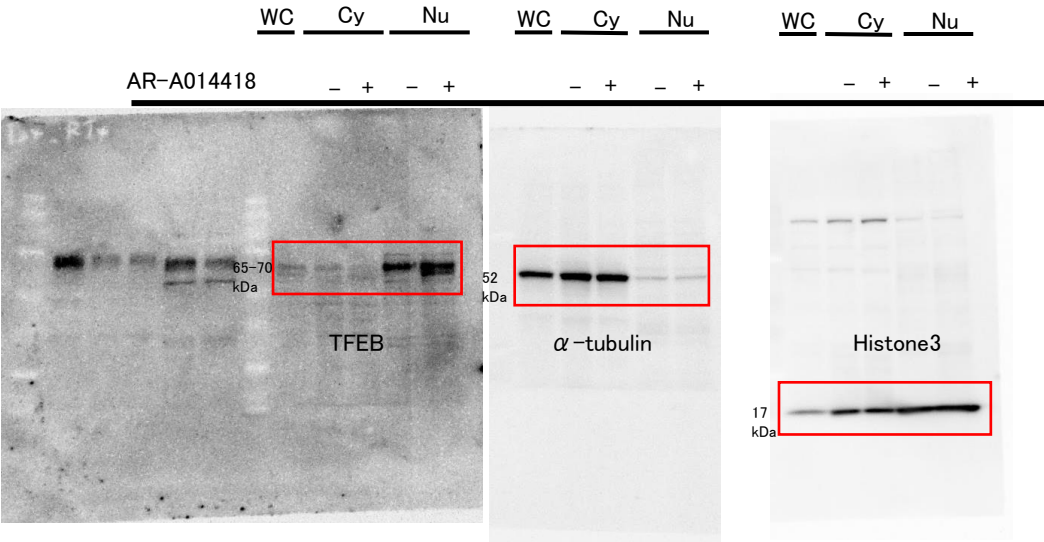

|                         | WC    | Cy    |       | Nu    |       |
|-------------------------|-------|-------|-------|-------|-------|
|                         |       | ARA-  | ARA+  | ARA-  | ARA+  |
| TFEB/ $\alpha$ -tubulin | 0.500 | 0.101 | 0.138 |       |       |
| TFEB/Histone3           |       |       |       | 0.879 | 1.040 |

l) HEK293

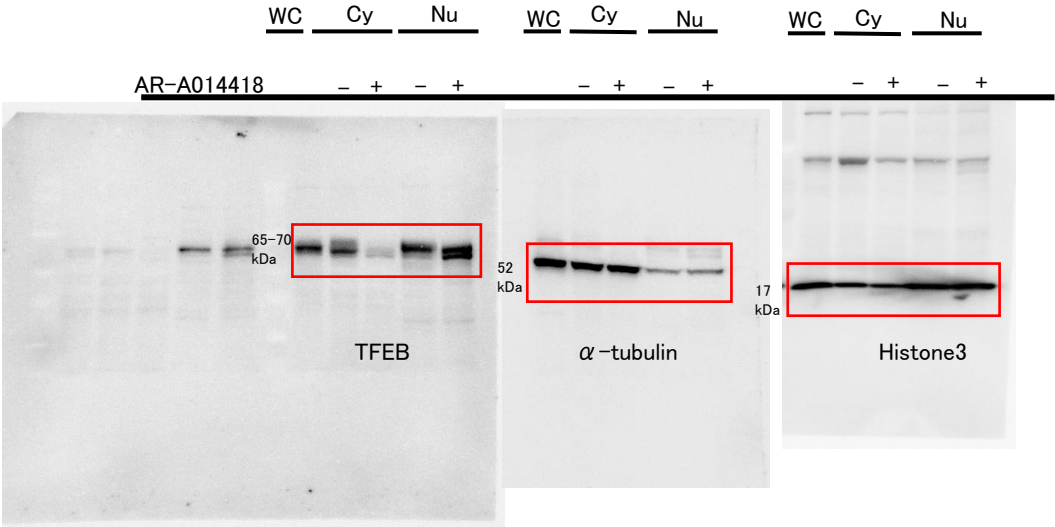

|                         | WC    | Cy    |       | Nu    |       |
|-------------------------|-------|-------|-------|-------|-------|
|                         |       | ARA-  | ARA+  | ARA-  | ARA+  |
| TFEB/ $\alpha$ -tubulin | 0.838 | 0.757 | 0.310 |       |       |
| TFEB/Histone3           |       |       |       | 0.967 | 1.100 |

m) T24

n)  
HT1376

AR-A014418 10  $\mu$  M

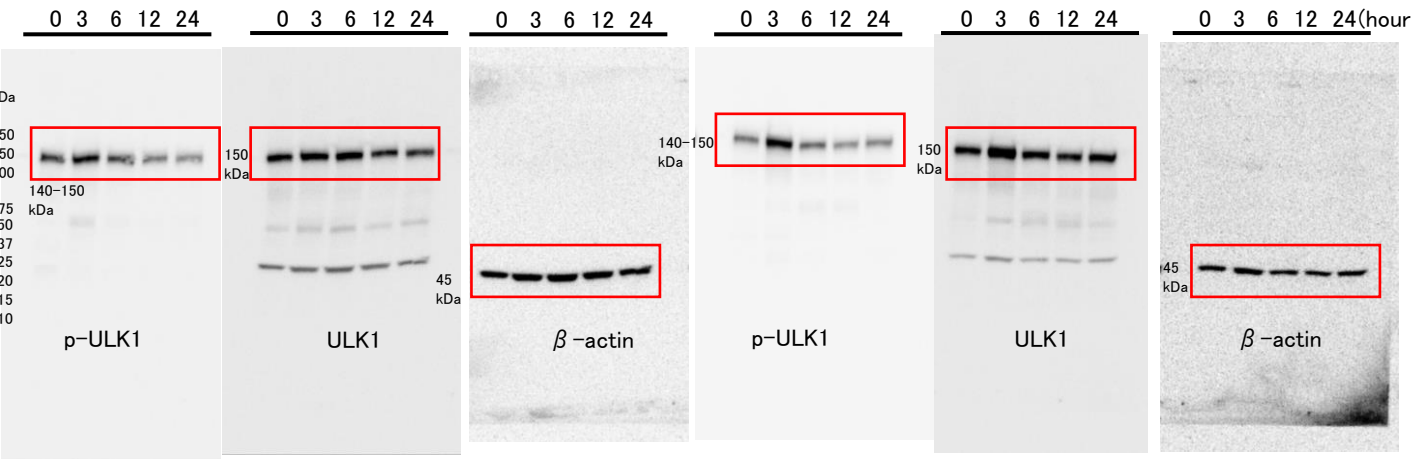

|                        | 0     | 3     | 6     | 12    | 24    | 0     | 3     | 6     | 12    | 24(hours) |
|------------------------|-------|-------|-------|-------|-------|-------|-------|-------|-------|-----------|
| p-ULK1/ULK1            | 0.794 | 0.929 | 0.662 | 0.607 | 0.559 | 0.580 | 0.846 | 0.555 | 0.449 | 0.454     |
| p-ULK1/ $\beta$ -actin | 0.950 | 1.115 | 0.768 | 0.536 | 0.499 | 0.812 | 1.425 | 0.908 | 0.703 | 0.732     |
| ULK1/ $\beta$ -actin   | 1.197 | 1.200 | 1.160 | 0.882 | 0.893 | 1.400 | 1.684 | 1.635 | 1.567 | 1.612     |

o) RT4

p)  
HEK293

AR-A014418 10  $\mu$  M

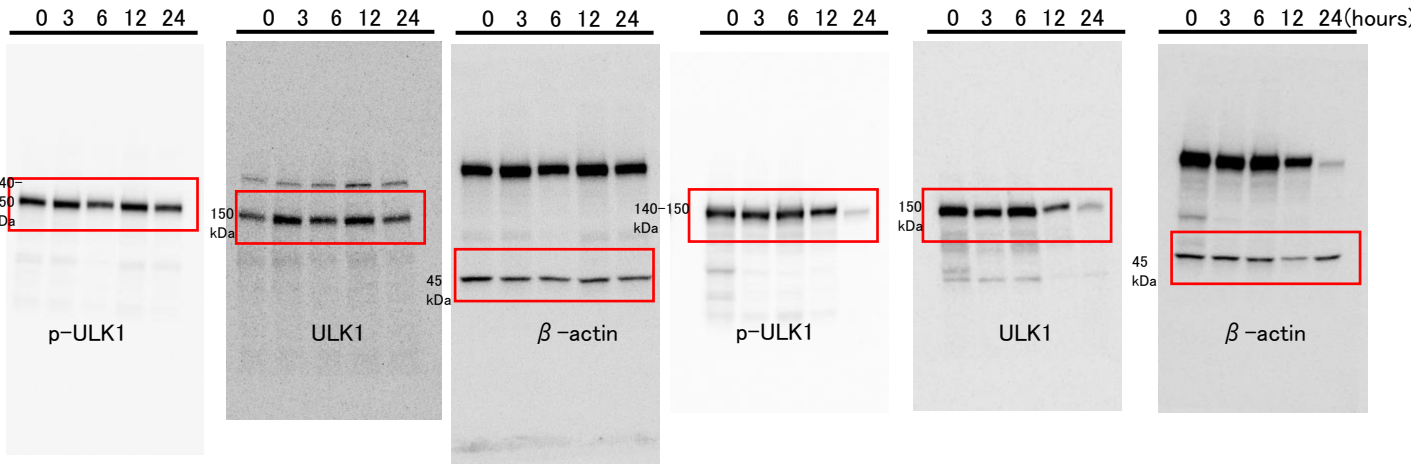

|                        | 0     | 3     | 6     | 12    | 24    | 0     | 3     | 6     | 12    | 24(hours) |
|------------------------|-------|-------|-------|-------|-------|-------|-------|-------|-------|-----------|
| p-ULK1/ULK1            | 1.755 | 1.043 | 1.139 | 1.169 | 1.442 | 0.940 | 1.080 | 0.899 | 1.559 | 0.942     |
| p-ULK1/ $\beta$ -actin | 1.544 | 1.887 | 1.525 | 1.704 | 1.608 | 2.235 | 2.267 | 2.719 | 4.001 | 0.448     |
| ULK1/ $\beta$ -actin   | 0.880 | 1.809 | 1.339 | 1.457 | 1.115 | 2.378 | 2.099 | 3.023 | 2.567 | 0.476     |

q) T24

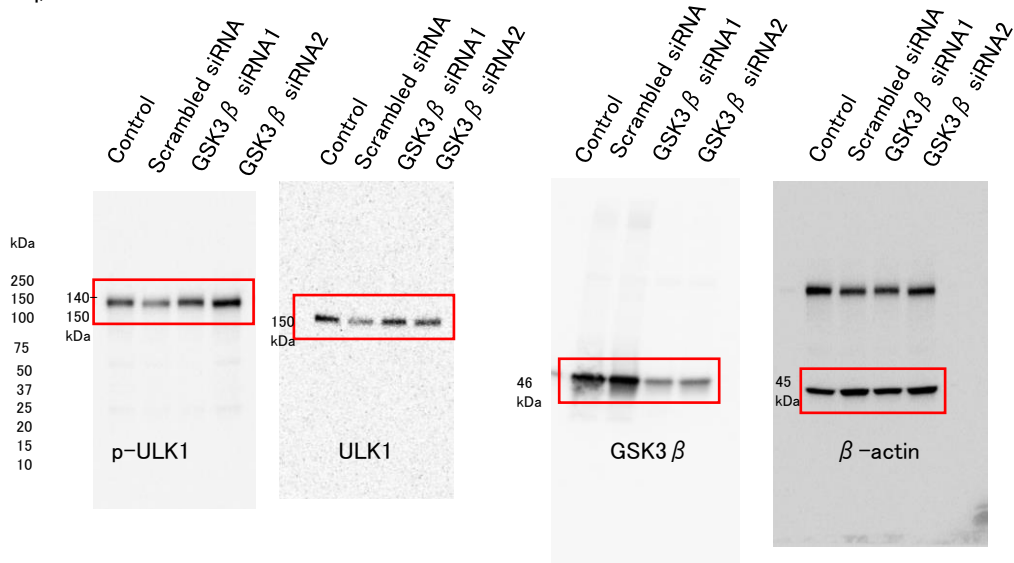

|                | Control | Scrambled siRNA | GSK-3β siRNA1 | GSK-3β siRNA2 |
|----------------|---------|-----------------|---------------|---------------|
| p-ULK2/β-actin | 0.906   | 0.512           | 0.916         | 1.049         |
| ULK1/β-actin   | 1.001   | 0.417           | 0.882         | 0.700         |
| GSK3β/β-actin  | 0.703   | 0.390           | 0.227         | 0.190         |

r) HT1376

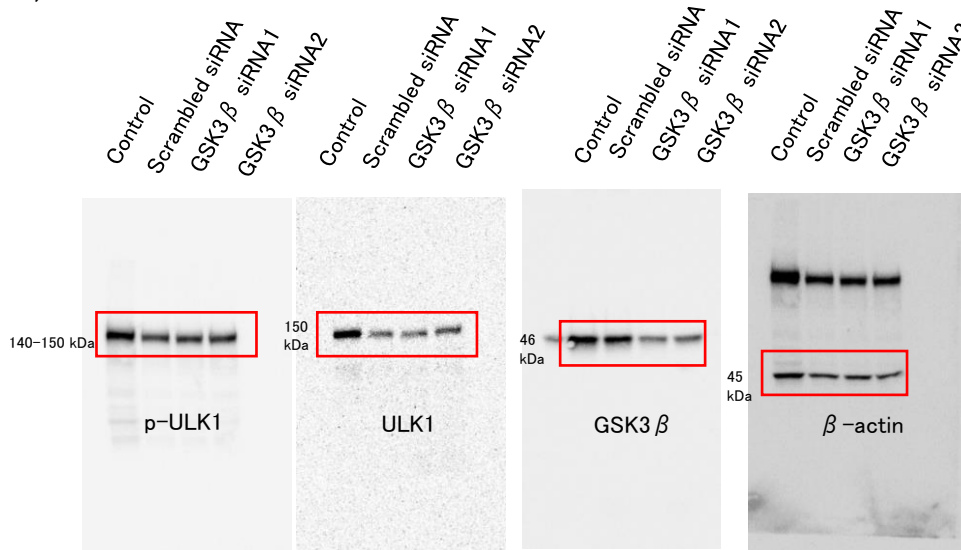

|                | Control | Scrambled siRNA | GSK-3β siRNA1 | GSK-3β siRNA2 |
|----------------|---------|-----------------|---------------|---------------|
| p-ULK2/β-actin | 1.491   | 1.381           | 1.229         | 1.743         |
| ULK1/β-actin   | 1.501   | 0.901           | 1.020         | 1.528         |
| GSK3β/β-actin  | 1.265   | 1.844           | 1.055         | 1.457         |



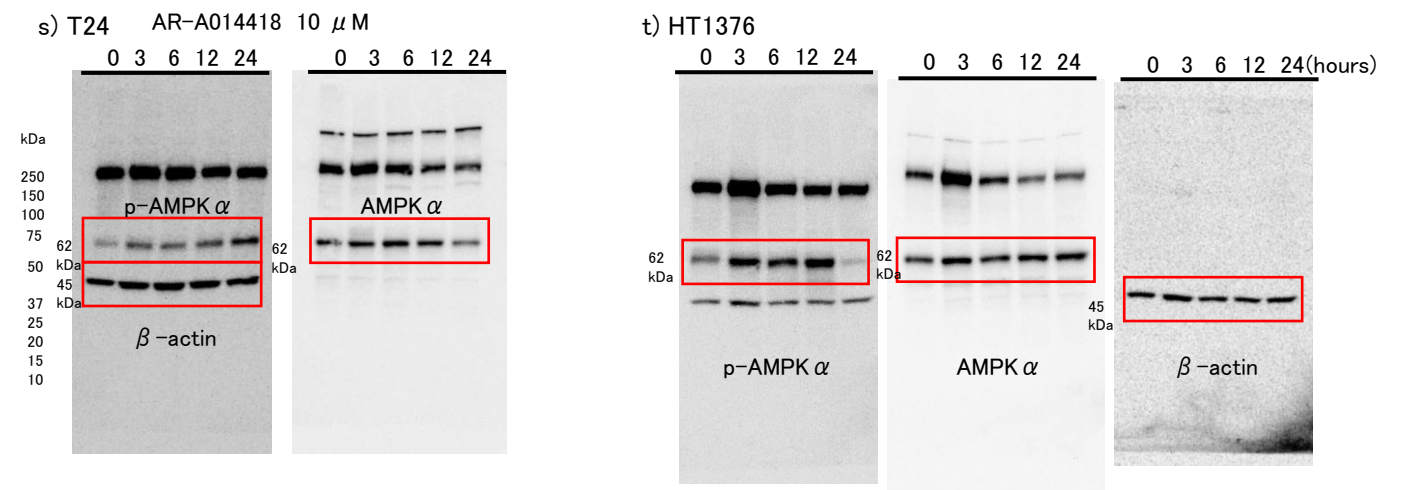

|                                  | 0     | 3     | 6     | 12    | 24    | 0     | 3     | 6     | 12    | 24(hours) |
|----------------------------------|-------|-------|-------|-------|-------|-------|-------|-------|-------|-----------|
| p-AMPK $\alpha$ / $\beta$ -actin | 0.496 | 0.676 | 0.592 | 0.762 | 1.049 | 1.280 | 1.552 | 1.718 | 1.844 | 0.198     |
| AMPK $\alpha$ / $\beta$ -actin   | 0.958 | 0.724 | 0.907 | 0.806 | 0.598 | 1.401 | 1.378 | 1.426 | 1.870 | 1.484     |

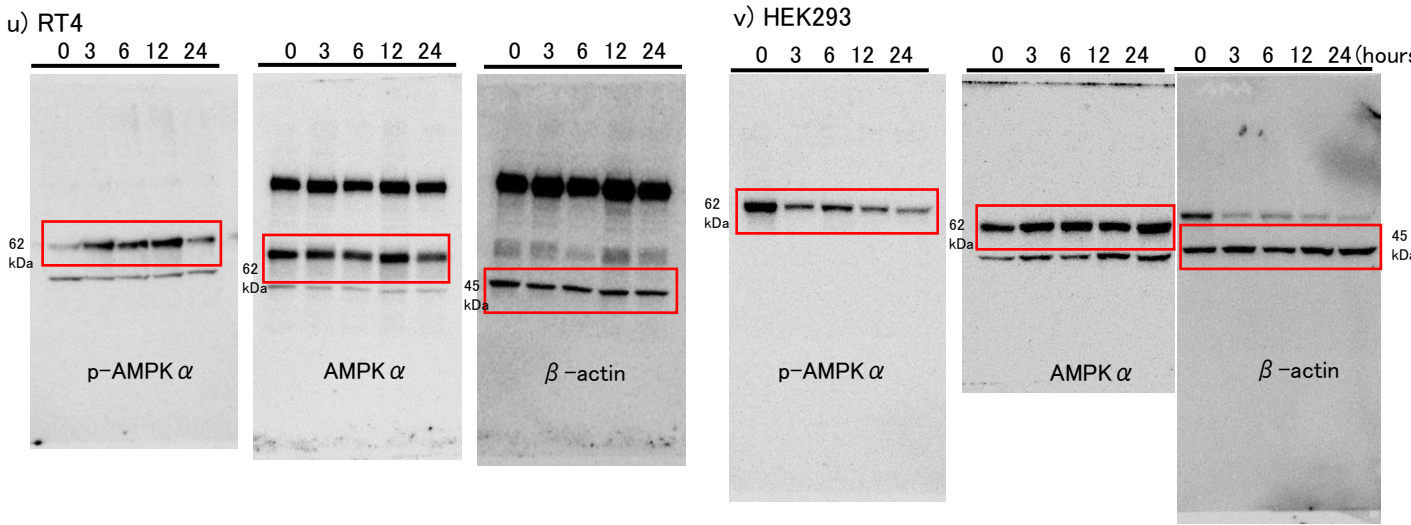

|                                  | 0     | 3     | 6     | 12    | 24    | 0     | 3     | 6     | 12    | 24(hours) |
|----------------------------------|-------|-------|-------|-------|-------|-------|-------|-------|-------|-----------|
| p-AMPK $\alpha$ / $\beta$ -actin | 0.264 | 1.185 | 1.088 | 1.661 | 0.969 | 1.927 | 0.708 | 1.109 | 0.537 | 0.517     |
| AMPK $\alpha$ / $\beta$ -actin   | 1.194 | 1.309 | 1.028 | 1.172 | 0.858 | 1.500 | 1.416 | 1.779 | 1.333 | 1.638     |

Supplementary Figure S4. Full-length images of western blot analyses and densitometry readings/intensity ratio of each band. a)-d) Full-length images presented in Figure 2b. e)-h) Full-length images presented in Figure 3a. i)-l) Full-length images presented in Figure 4c. m)-p) Full-length images presented in Figure 5a. q), r) Full-length images presented in Figure 5c. s)-v) Full-length images presented in Figure 5d. The red square depicts the area presented in the main figures.
